# Supplementary material for: Characterizing the Type 6 Secretion System (T6SS) and its role in the virulence of avian pathogenic Escherichia coli strain APECO18
Source: PeerJ journal article supplement (doi:10.7717/peerj.12631), 2021-12-17

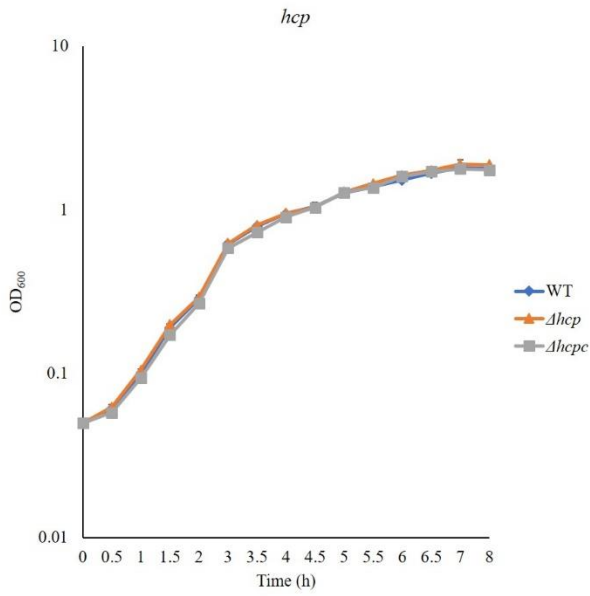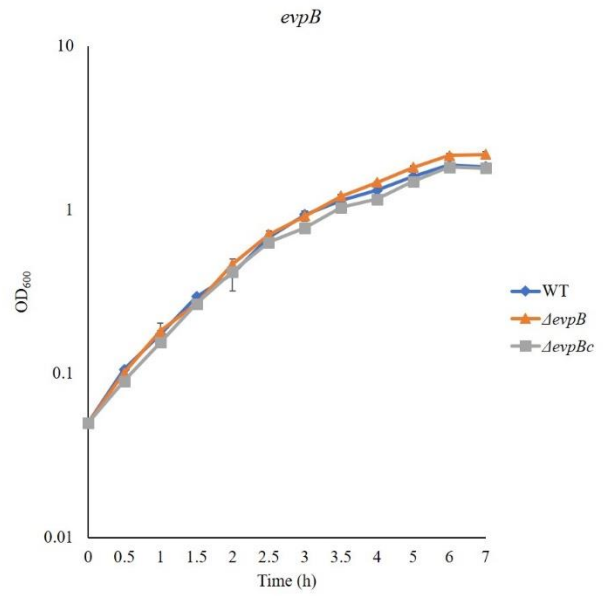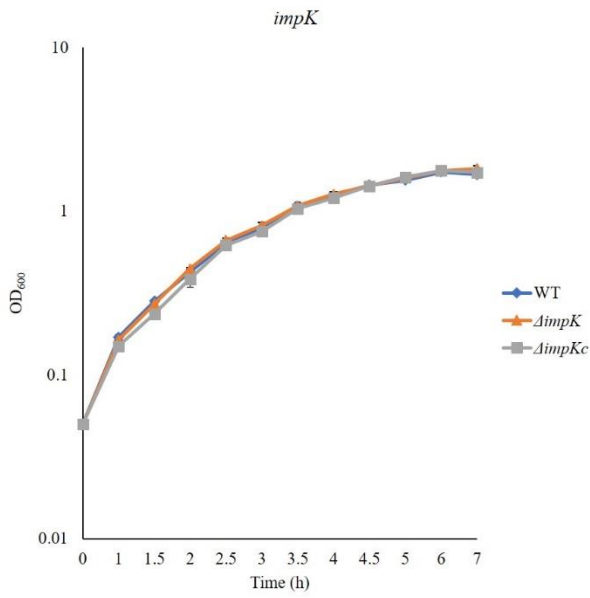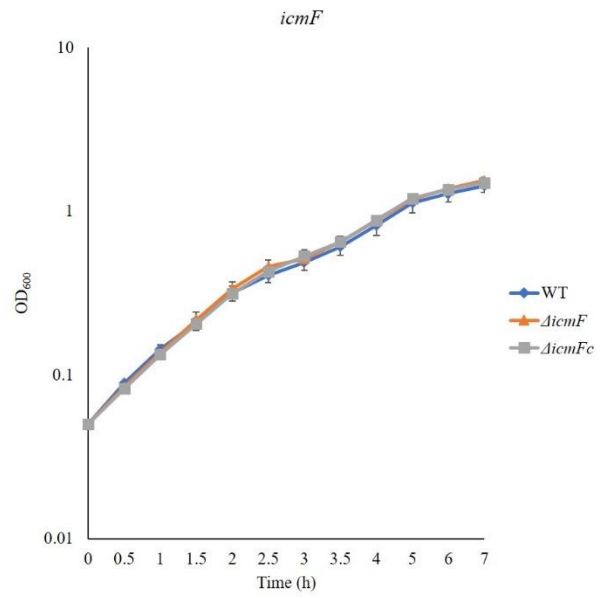

Supplement: Supplemental_Figure_2_11.12.21_no_text.pdf [file Supplemental_Figure_2_11.12.21_no_text.pdf]
